# Supplementary material for: Pre-Stroke Statin Use Is Associated with Mild Neurological Deficits at the Onset of Acute Ischemic Stroke
Source: MDPI journal article supplement (doi:10.3390/jcdd9110396), 2022-11-16
Supplement: s1 [file s1]

## Supplementary Information:

**Table S1.** Comparison of variables between patients with and without pre-stroke statin use before propensity score matching (n=2615)

| Variables                              | Before PSM          |                         | <i>p</i> -value |
|----------------------------------------|---------------------|-------------------------|-----------------|
|                                        | Statin use<br>n=594 | No statin use<br>n=2021 |                 |
| Age, years                             | 78 (72–84)          | 78 (69–85.5)            | 0.4390          |
| Male sex, n (%)                        | 339 (57.1%)         | 1124 (55.6%)            | 0.5298          |
| Pre-stroke mRS                         | 0 (0–2)             | 0 (0–3)                 | 0.9052          |
| History of anti-HT drugs, n (%)        | 442 (74.4%)         | 888 (49.4%)             | <0.0001         |
| History of diabetes drugs, n (%)       | 174 (29.3%)         | 237 (11.7%)             | <0.0001         |
| History of antiplatelets drugs, n (%)  | 265 (44.6%)         | 401 (19.8%)             | <0.0001         |
| History of anticoagulants drugs, n (%) | 93 (15.7%)          | 229 (11.3%)             | 0.0059          |
| History of hp-EPA drugs, n (%)         | 34 (4.80%)          | 13 (1.7%)               | 0.0008          |
| Albumin adm, g/L                       | 40 (37–43)          | 40 (38–43)              | 0.2398          |
| Creatinine adm, $\mu$ mol/L            | 77.8 (63.6–97.2)    | 72.5 (60.1–91.1)        | <0.0001         |
| Glucose adm, mmol/L                    | 6.99 (5.88–8.82)    | 6.61 (5.77–8.16)        | 0.0009          |
| HbA1c adm, % (NGSP)                    | 6.0 (5.7–6.6)       | 5.7 (5.4–6.2)           | <0.0001         |
| CRP adm, $\mu$ g/L                     | 1100 (400–3400)     | 1200 (500–3900)         | 0.0328          |
| HDL-C adm, mmol/L                      | 1.41 (1.16–1.70)    | 1.43 (1.17–1.74)        | 0.2221          |
| TG adm, mmol/L                         | 1.17 (0.83–1.65)    | 1.07 (0.77–1.63)        | 0.0140          |
| TCHO adm, mmol/L                       | 4.60 (3.98–5.22)    | 5.20 (4.50–5.90)        | <0.0001         |
| LDL-C adm, mmol/L                      | 2.53 (2.04–3.02)    | 3.09 (2.49–3.72)        | <0.0001         |
| SVO, n (%)                             | 76 (12.8%)          | 353 (17.5%)             | 0.0057          |
| LAA, n (%)                             | 191 (32.2%)         | 493 (24.4%)             | 0.0002          |
| Cardioembolism, n (%)                  | 180 (30.3%)         | 677 (33.5%)             | 0.1428          |
| ODE or UE, n (%)                       | 147 (24.8%)         | 498 (24.6%)             | 0.9579          |
| NIHSS score adm                        | 3 (1–9)             | 2 (2–11)                | <0.0001         |
| NIHSS score adm $\leq$ 3 points, n (%) | 308 (51.9%)         | 895 (44.3%)             | 0.0012          |
| Hospitalization, days                  | 8 (7–9)             | 8 (7–9)                 | 0.1345          |
| Discharge to home, n (%)               | 310 (52.2%)         | 930 (46.0%)             | 0.0081          |

All values, except the categorical data, are presented as medians (interquartile ranges).

adm, at admission; CRP, C-reactive protein; Glu, glucose; HbA1c, glycated hemoglobin; HDL-C, high density lipoprotein cholesterol; hp-EPA, highly purified eicosapentaenoic acid; HT, hypertension; IQR, interquartile range; med, median; LAA, large artery atherosclerosis; LDL-C, low density lipoprotein cholesterol; med, median; n, number; mRS, modified Rankin scale; n, number; NGSP, National Glycohemoglobin Standardization Program; NIHSS, National Institute of Health Stroke Scale; ODE, other determined etiology; *p*, probability; PM, propensity matching; PSM, propensity score matching; SVO, small vessel occlusion; TCHO, total cholesterol; TG, triglyceride; UE, undetermined etiology

**Table S2.** Logistic regression analysis for pre-stroke statin use (n=2615)

| Variables                                | Odds ratio<br>(95% CI) | <i>p</i> -value | AUC   | BIC  |
|------------------------------------------|------------------------|-----------------|-------|------|
|                                          |                        | <0.0001         | 0.724 | 2529 |
| History of antiplatelets drugs (yes/no)  | 2.53 (2.04–3.13)       | <0.0001         |       |      |
| History of anti-HT drugs (yes/no)        | 2.20 (1.76–2.76)       | <0.0001         |       |      |
| History of diabetes drugs (yes/no)       | 2.15 (1.63–2.84)       | <0.0001         |       |      |
| HbA1c adm                                | 1.21 (1.06–1.38)       | 0.0011          |       |      |
| History of anticoagulants drugs (yes/no) | 1.50 (1.13–1.99)       | 0.0052          |       |      |
| Albumin adm                              | 1.03 (1.01–1.06)       | 0.0118          |       |      |
| Glucose adm                              | 0.96 (0.91–1.00)       | 0.0761          |       |      |
| CRP adm                                  | 0.99 (0.99–1.00)       | 0.1418          |       |      |
| History of hp-EPA drugs (yes/no)         | 1.37 (0.82–2.28)       | 0.2301          |       |      |
| Age                                      | 1.00 (0.99–1.01)       | 0.4465          |       |      |
| Creatinine adm                           | 1.00 (0.99–1.00)       | 0.5655          |       |      |
| Male sex (yes/no)                        | 0.95 (0.77–1.17)       | 0.5965          |       |      |

AUC, area under the curve; BIC, Bayesian information criterion; adm, at admission; CI, confidence interval; CRP, C-reactive protein; HbA1c, glycated hemoglobin; hp-EPA, highly purified eicosapentaenoic acid; HT, hypertension; n, number; *p*, probability

**Table S3.** Statins after propensity score matching (n=555)

| Statins      | Dose       | Feature  | n   | %    |
|--------------|------------|----------|-----|------|
| Rosuvastatin | 2.5 mg/day | Strong   | 175 | 31.5 |
| Atorvastatin | 10 mg/day  | Strong   | 155 | 27.9 |
| Pravastatin  | 10 mg/day  | Standard | 117 | 21.1 |
| Pitavastatin | 2 mg/day   | Strong   | 84  | 15.1 |
| Fluvastatin  | 20 mg/day  | Standard | 12  | 2.2  |
| Simvastatin  | 5 mg/day   | Standard | 12  | 2.2  |

n, number

**Table S4.** Relationship among pre-stroke statin use, NIHSS score, and home discharge after propensity score matching

|               | NIHSS<br>adm | n   | Discharge home | No home discharge | <i>p</i> -value |
|---------------|--------------|-----|----------------|-------------------|-----------------|
| Statin use    | NIHSS ≤3     | 286 | 225 (78.7%)    | 61 (21.3%)        | <0.0001         |
|               | NIHSS ≥4     | 269 | 64 (23.8%)     | 205 (76.2%)       |                 |
|               |              | 555 | 289 (52.1%)    | 266 (47.9%)       |                 |
| No statin use | NIHSS ≤3     | 252 | 169 (67.1%)    | 83 (32.9%)        | <0.0001         |
|               | NIHSS ≥4     | 303 | 84 (27.7%)     | 219 (72.3%)       |                 |
|               |              | 555 | 253 (45.6%)    | 302 (54.4%)       |                 |

Adm, at admission; n, number; NIHSS, National Institute of Health Stroke Scale; *p*, probability

**Table S5.** NIHSS score by stroke subtypes after propensity score matching

| Variables             | NIHSS score adm | <i>p</i> -value |
|-----------------------|-----------------|-----------------|
|                       |                 | <0.0001         |
| SVO, n=159            | 3 (1–5)         |                 |
| LAA, n=333            | 3 (1–7)         |                 |
| Cardioembolism, n=366 | 9 (3–19)        |                 |
| ODE or UE, n=252      | 2 (0–5)         |                 |

All values, except the categorical data, are presented as medians (interquartile ranges).

adm, at admission; LAA, large artery atherosclerosis; n, number; NIHSS, National Institute of Health Stroke Scale; ODE, other determined etiology; *p*, probability; PSM, propensity score matching; SVO, small vessel occlusion; UE, undetermined etiology

**Table S6.** Comparison of NIHSS score between stroke subtypes after propensity score matching

| Variables                    | <i>p</i> -value |
|------------------------------|-----------------|
| Cardioembolism vs. SVO       | <0.0001         |
| Cardioembolism vs. LAA       | <0.0001         |
| Cardioembolism vs. ODE or UE | <0.0001         |
| LAA vs. SVO                  | 0.0078          |
| LAA vs. ODE or UE            | 0.0001          |
| SVO vs. ODE or UE            | 0.2192          |

adm, at admission; LAA, large artery atherosclerosis; n, number; NIHSS, National Institute of Health Stroke Scale; ODE, other determined etiology; *p*, probability; SVO, small vessel occlusion; UE, undetermined etiology; vs, versus

**Table S7.** NIHSS score in patients with and without pre-stroke statin use by stroke subtypes after propensity score matching

| Variables             | NIHSS score adm after PSM |               | <i>p</i> -value |
|-----------------------|---------------------------|---------------|-----------------|
|                       | Statin use                | No statin use |                 |
| SVO, n=159            | 3 (1–4)                   | 3 (1–5)       | 0.5425          |
| LAA, n=333            | 3 (1–6)                   | 3.5 (2–10)    | 0.0089          |
| Cardioembolism, n=366 | 8 (2–20)                  | 10 (3–19)     | 0.5044          |
| ODE or UE, n=252      | 2 (0–5)                   | 3 (1–5)       | 0.0770          |

All values, except the categorical data, are presented as medians (interquartile ranges).

adm, at admission; LAA, large artery atherosclerosis; n, number; NIHSS, National Institute of Health Stroke Scale; ODE, other determined etiology; *p*, probability; PSM, propensity score matching; SVO, small vessel occlusion; UE, undetermined etiology
